# Supplementary material for: Relative Effectiveness of Cell-Cultured versus Egg-Based Seasonal Influenza Vaccines in Preventing Influenza-Related Outcomes in Subjects 18 Years Old or Older: A Systematic Review and Meta-Analysis
Source: Preprints.org preprint supplement (doi:10.20944/preprints202111.0132.v2), 2021-12-20
Supplement: Supplementary file 1 [file supplementary]

Table S2 Leave one out analysis, 2017-2018 and 2018-2019.

Random-effects model Method: REML

|  |  | |  |  |  |
| --- | --- | --- | --- | --- | --- |
| Season and Omitted study | aRR | | [95% conf | interval] | p-value |
|  |  | |  |  |  |
| 2017-2018 Influenza season |  | |  |  |  |
| Boikos 2020a | 0.891 | | 0.865 | 0.918 | 0.000 |
| Bruxvoort 2019a | 0.892 | | 0.866 | 0.919 | 0.000 |
| Divino 2020 | 0.921 | | 0.858 | 0.988 | 0.022 |
| Eick-Cost 2018 | 0.890 | | 0.863 | 0.917 | 0.000 |
| Izurieta 2019b | 0.924 | | 0.845 | 1.010 | 0.080 |
| Klein 2020a | 0.890 | | 0.864 | 0.917 | 0.000 |
| Martin 2020c | 0.892 | | 0.866 | 0.919 | 0.000 |
|  |  | |  |  |  |
| exp(theta) | 0.892 | | 0.866 | 0.919 | 0.000 |
|  |  |  | |  |  |
| 2018-2019 influenza season |  |  | |  |  |
|  |  |  | |  |  |
| Boikos 2021c | 0.947 | 0.920 | | 0.975 | 0.000 |
| Boikos 2021d | 0.993 | 0.952 | | 1.035 | 0.725 |
| Fu Tseng 2019b | 0.971 | 0.929 | | 1.015 | 0.192 |
| Izurieta 2020a | 0.972 | 0.917 | | 1.029 | 0.325 |
| Krishnarajah 2021 | 0.977 | 0.927 | | 1.029 | 0.377 |
|  |  |  | |  |  |
| exp(theta) | 0.972 | 0.931 | | 1.015 | 0.200 |

aRR, adjusted relative risk

exp(theta) poooled adjusted relative risk
