# Supplementary material for: Relative Effectiveness of Cell-Cultured versus Egg-Based Seasonal Influenza Vaccines in Preventing Influenza-Related Outcomes in Subjects 18 Years Old or Older: A Systematic Review and Meta-Analysis
Source: Preprints.org preprint supplement (doi:10.20944/preprints202111.0132.v2), 2021-12-20

Figure S5. Non parametric trim-and-fill analysis restricted to the 2017-2018 season with multiple dependent and outlier results.

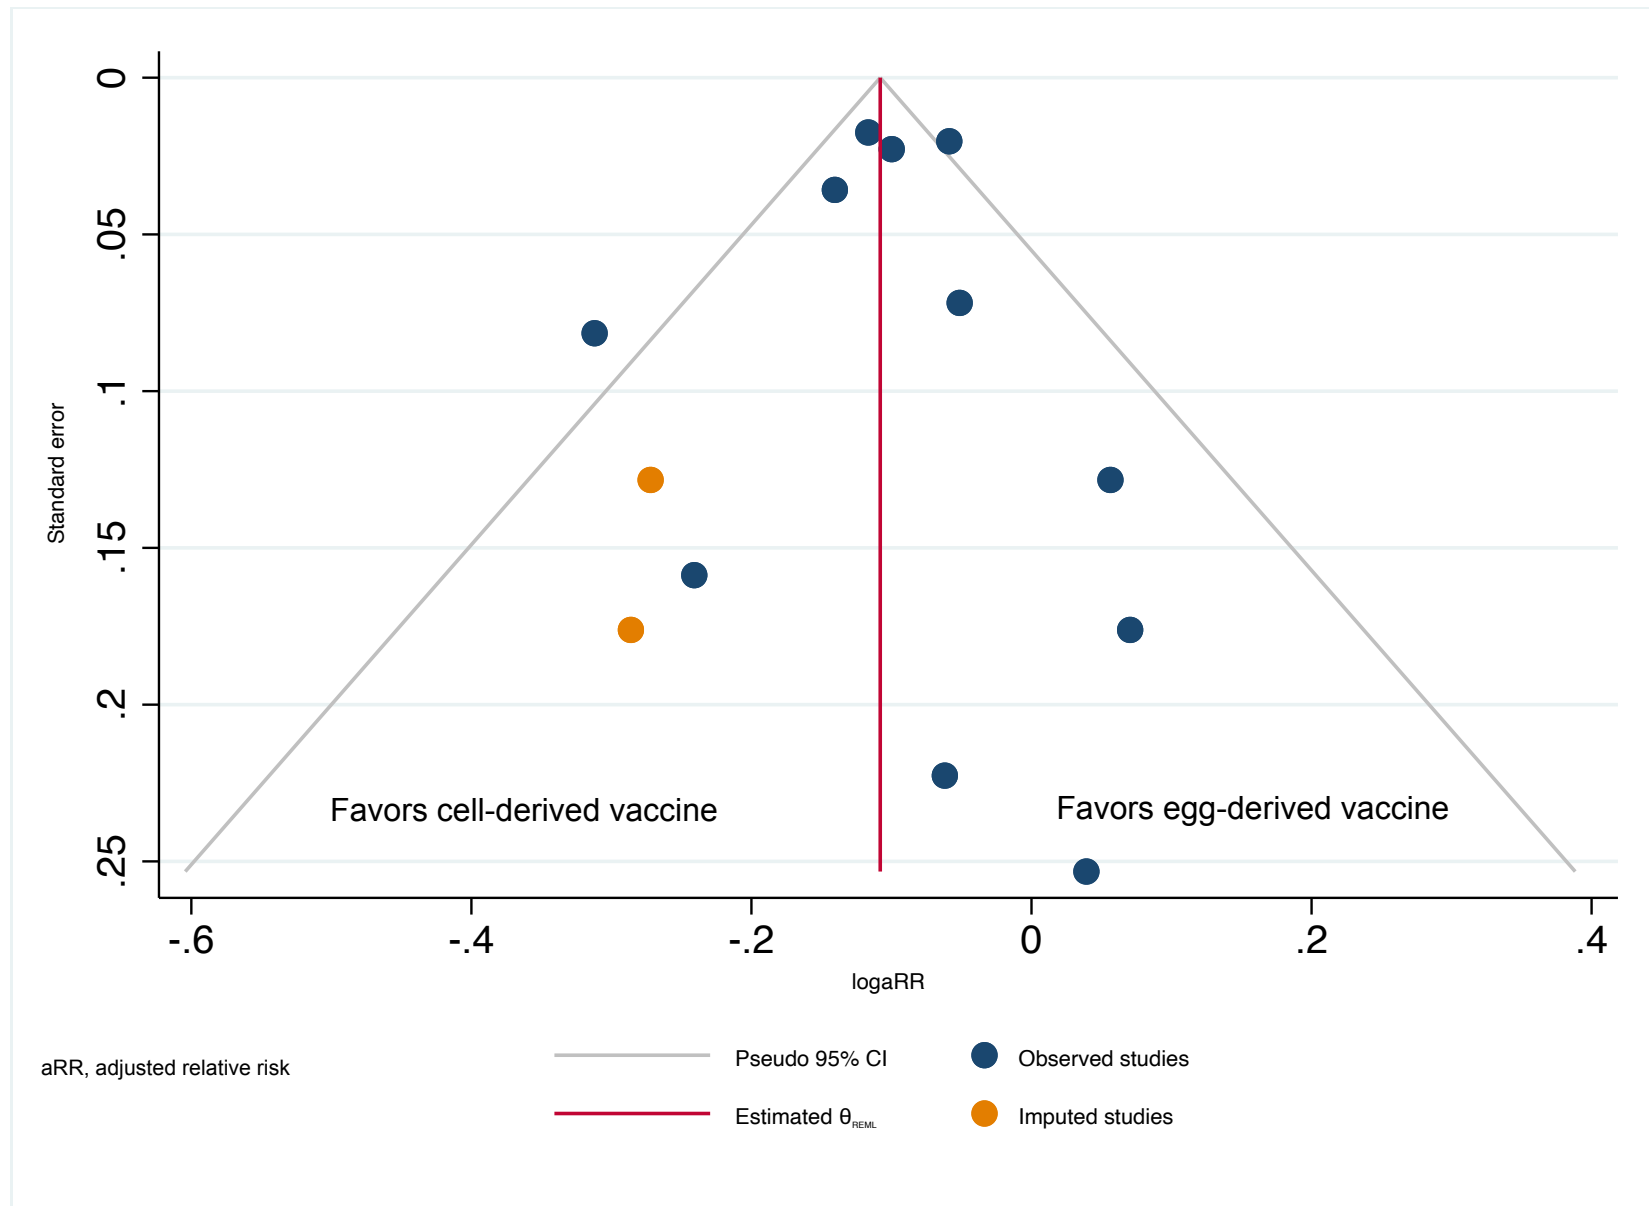

Supplement: Supplementary file 5 [file supplementary]
