# Supplementary material for: Relative Effectiveness of Cell-Cultured versus Egg-Based Seasonal Influenza Vaccines in Preventing Influenza-Related Outcomes in Subjects 18 Years Old or Older: A Systematic Review and Meta-Analysis
Source: Preprints.org preprint supplement (doi:10.20944/preprints202111.0132.v2), 2021-12-20
Supplement: Supplementary file 7 [file supplementary]

Figure S1. Other confounders contribution to heterogeneity

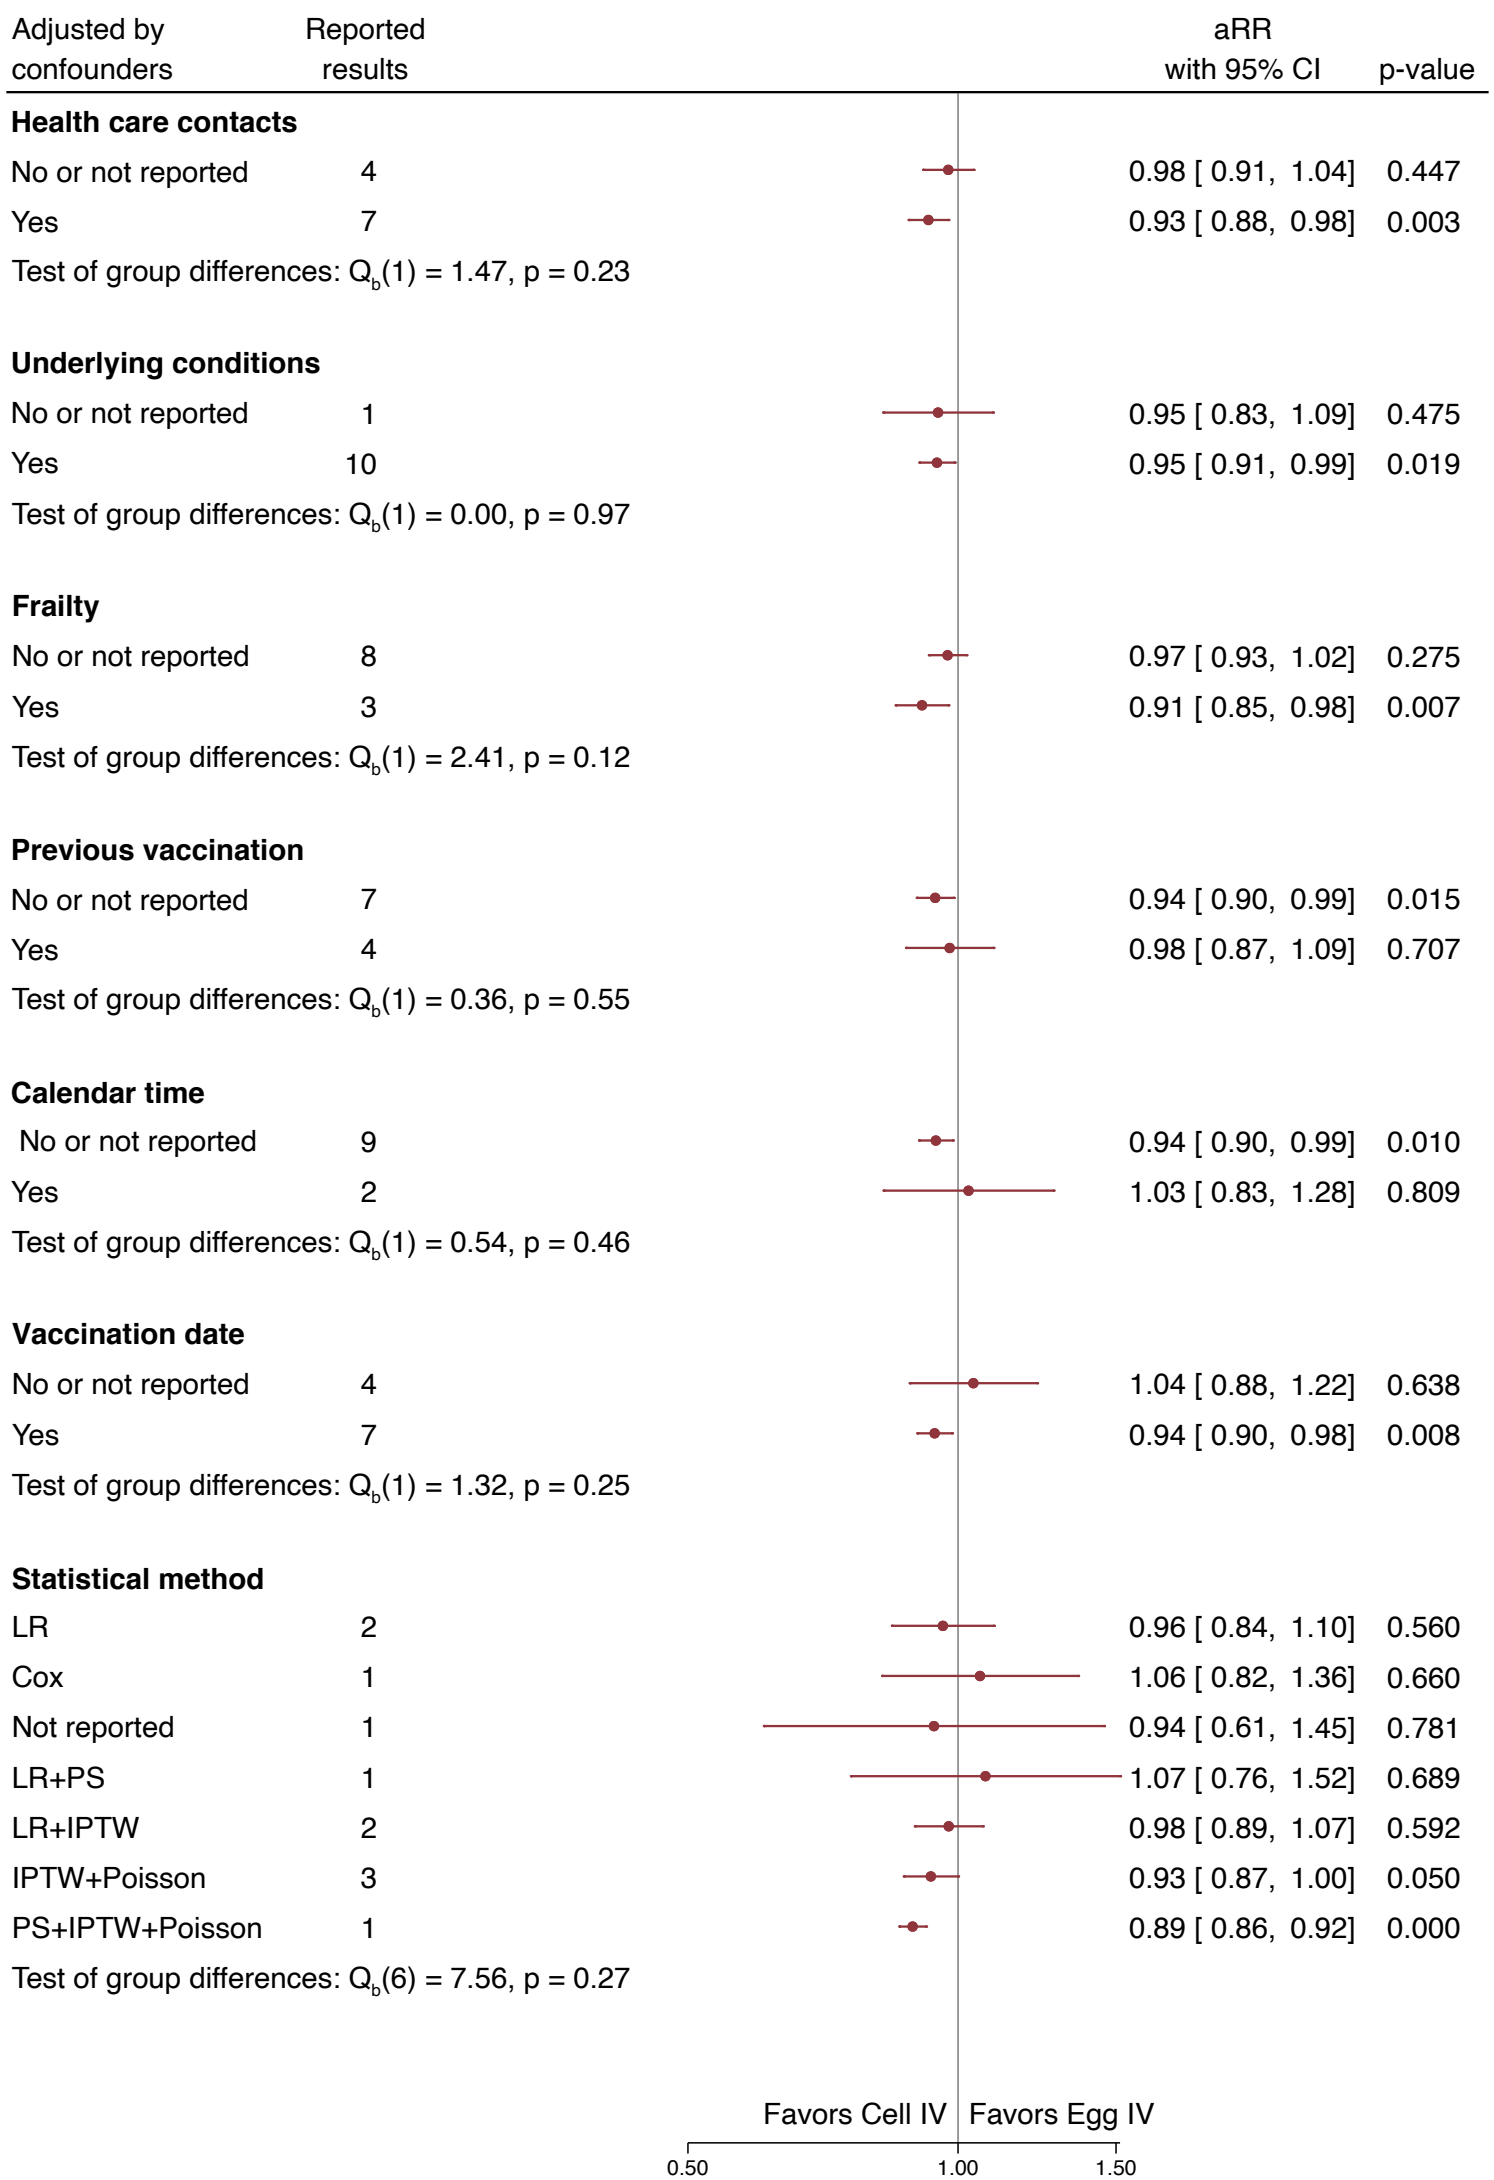

aRR, adjusted relative risk. CI, confidence interval.  
Results excluded, motive and identifier:  
Outlier: Boikos 2020b. Multiple dependent estimates: Bruxvoort 2019b;  
Izurieta 2019a; Izurieta 2019c; Klein 2020b; Fu Tseng 2019a; Fu Tseng 2019c; Fu Tseng 2019d; Fu Tseng 2019e;  
and Izurieta 2020b  
Unique estimates in their category: Izurieta 2020c and d (2019-2020 season) and Martin 2020 (age-group ≥ 18).
