# Supplementary material for: Relative Effectiveness of Cell-Cultured versus Egg-Based Seasonal Influenza Vaccines in Preventing Influenza-Related Outcomes in Subjects 18 Years Old or Older: A Systematic Review and Meta-Analysis
Source: Preprints.org preprint supplement (doi:10.20944/preprints202111.0132.v2), 2021-12-20

Figure S2. Funnel plot of effect estimates  
of the relative vaccine effectiveness of cell-culture vs egg-culture influenza vaccines  
in preventing influenza related outcomes in subjects  $\geq 18$

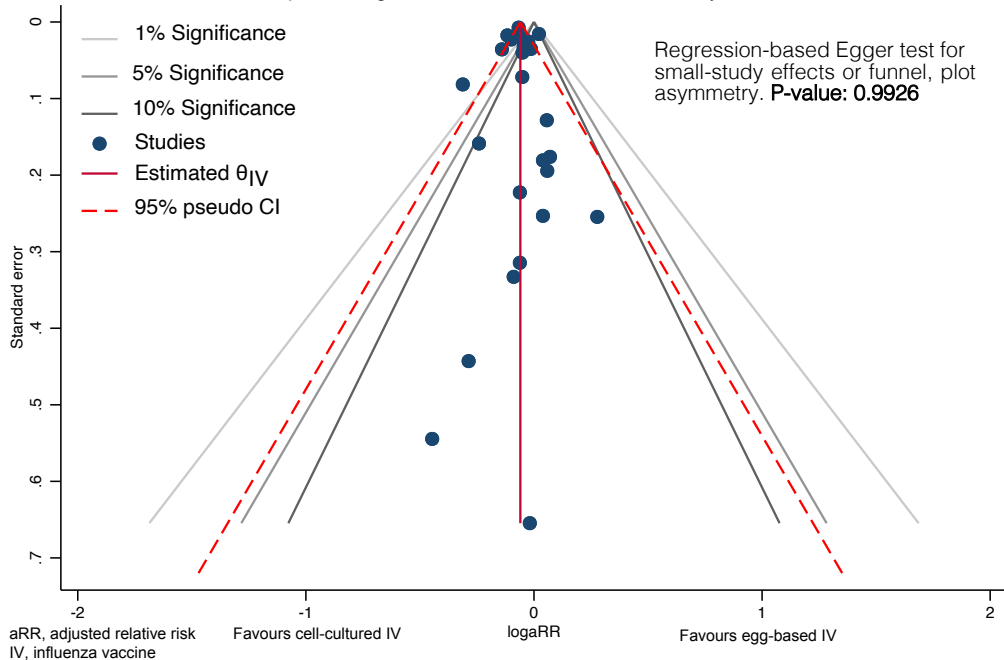

Supplement: Supplementary file 8 [file supplementary]
