# Supplementary material for: Relative Effectiveness of Cell-Cultured versus Egg-Based Seasonal Influenza Vaccines in Preventing Influenza-Related Outcomes in Subjects 18 Years Old or Older: A Systematic Review and Meta-Analysis
Source: Preprints.org preprint supplement (doi:10.20944/preprints202111.0132.v2), 2021-12-20

Figure S3. Graphical and statistical small study bias analysis by season, age group, reported outcome, outcome determination method, study design, funding and risk of bias (I)

a

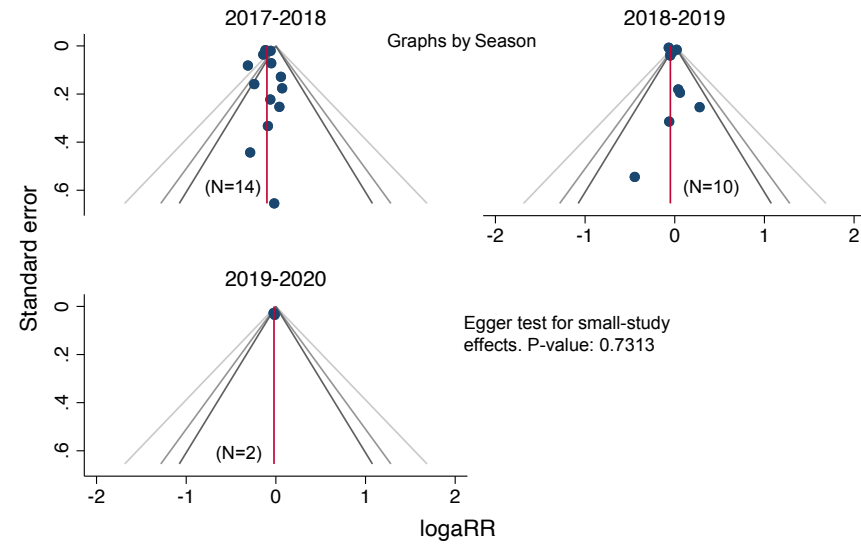

b

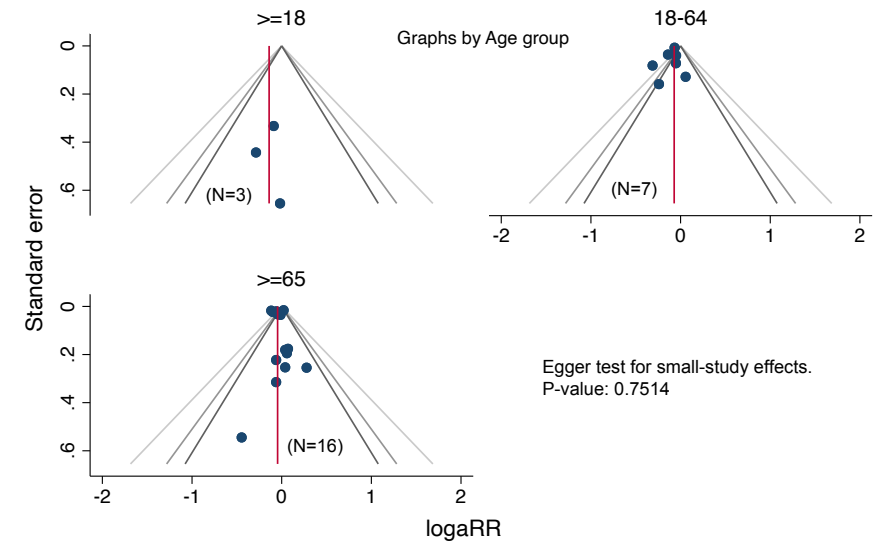

c

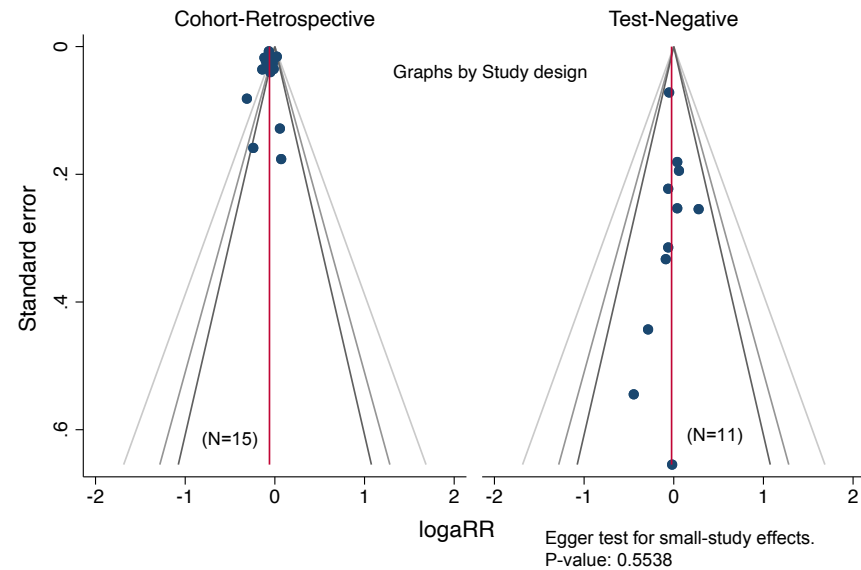

d

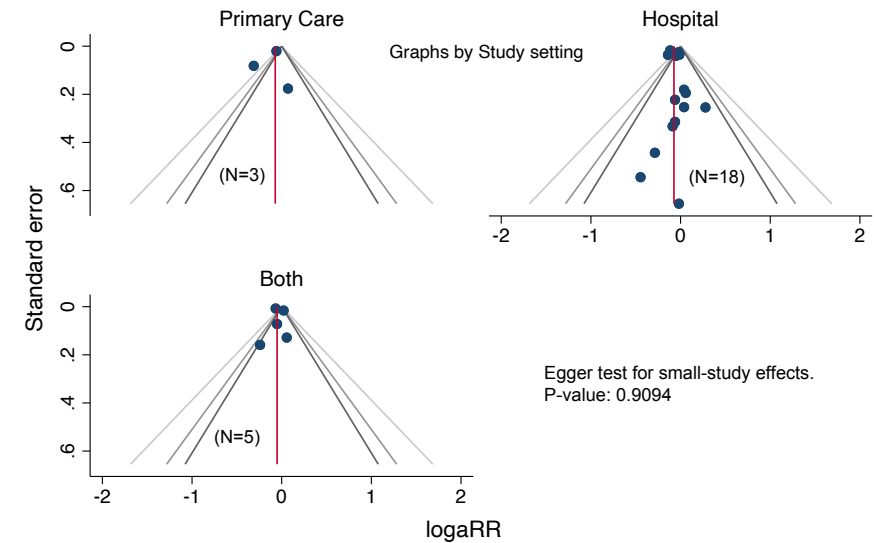

Figure S3. Graphical and statistical small study bias analysis by season, age group, reported outcome, outcome determination method, study design, funding and risk of bias (II)

e

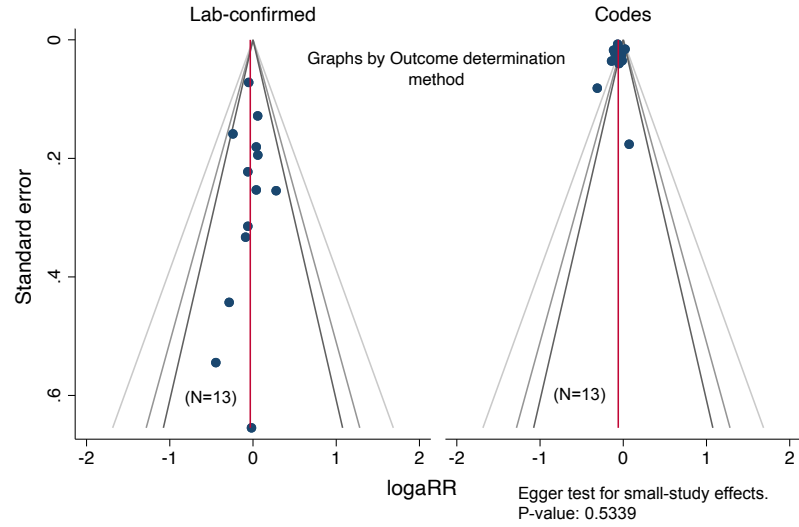

f

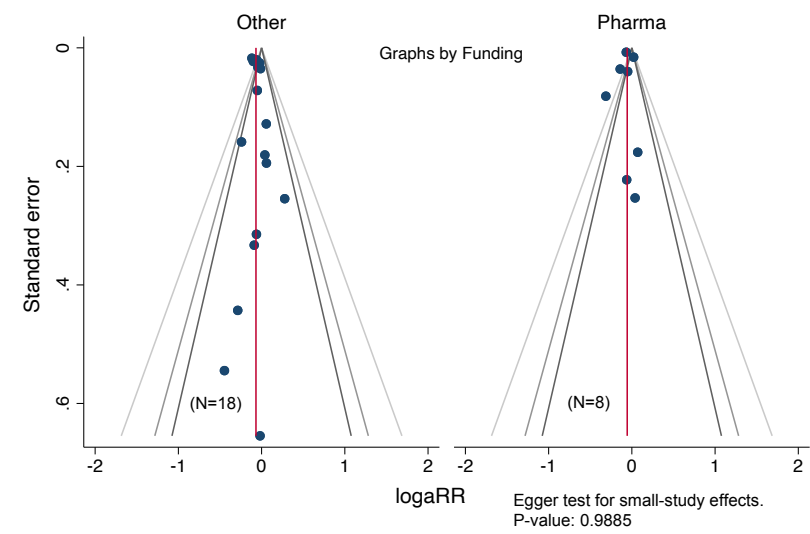

g

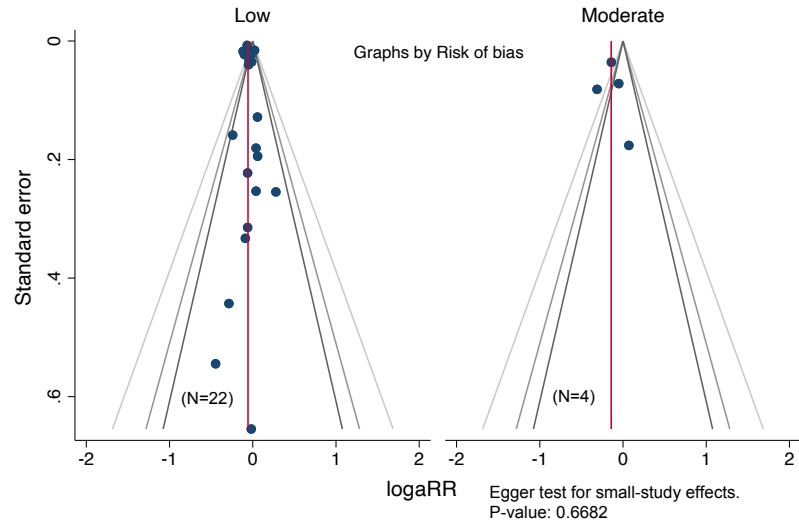

Supplement: Supplementary file 9 [file supplementary]
