# Supplementary material for: Relative Effectiveness of Cell-Cultured versus Egg-Based Seasonal Influenza Vaccines in Preventing Influenza-Related Outcomes in Subjects 18 Years Old or Older: A Systematic Review and Meta-Analysis
Source: Preprints.org preprint supplement (doi:10.20944/preprints202111.0132.v2), 2021-12-20
Supplement: Supplementary file 11 [file supplementary]

Archive with 15 entries (14 files):
- Supplental/
- Supplental/Table S1 Studies reporting relative vaccine effectiveness v04.xlsx
- __MACOSX/Supplental/._Table S1 Studies reporting relative vaccine effectiveness v04.xlsx
- Supplental/Figure_S1_v04.pdf
- __MACOSX/Supplental/._Figure_S1_v04.pdf
- Supplental/Figure_S2_v04.pdf
- __MACOSX/Supplental/._Figure_S2_v04.pdf
- Supplental/Table S2 Sensitivity Leave one out analysis v04.docx
- __MACOSX/Supplental/._Table S2 Sensitivity Leave one out analysis v04.docx
- Supplental/Figure_S4_v04.pdf
- __MACOSX/Supplental/._Figure_S4_v04.pdf
- Supplental/Figure_S3 Funnel plots a to g_v04.pdf
- __MACOSX/Supplental/._Figure_S3 Funnel plots a to g_v04.pdf
- Supplental/Figure_S5_v04.pdf
- __MACOSX/Supplental/._Figure_S5_v04.pdf
