# Supplementary material for: Relative Effectiveness of Cell-Cultured versus Egg-Based Seasonal Influenza Vaccines in Preventing Influenza-Related Outcomes in Subjects 18 Years Old or Older: A Systematic Review and Meta-Analysis
Source: Preprints.org preprint supplement (doi:10.20944/preprints202111.0132.v2), 2021-12-20
Supplement: Supplementary file 11 [file supplementary › Supplental/Table S1 Studies reporting relative vaccine effectiveness v04.xlsx]

## Sheet: Table S1
Table S1. Studies reporting relative vaccine effectiveness of cell-derived influenza seasonal vaccines compared to egg-derived influenza seasonal vaccines, after the exclusion of duplicates.
Auhor, year	Season	Study design	Age-group	Outcome	arVE	95%CI		Funding	Excluded	Exclusion main reason
Boikos 2020a	2017-2018	Cohort-retrospective	≥65	Outpatient consultation, ILI	-7.3	-51.6	24	Pharma	No
Boikos 2020b	2017-2018	Cohort-retrospective	18-64	Outpatient consultation, ILI	26.8	14.1	37.6	Pharma	No
Bruxvoort 2019a	2017-2018	Test-negative	≥65	Hospital admission with influenza	6	-46	39	Pharma	No
Bruxvoort 2019b	2017-2018	Test-negative	≥65	Hospital admission with influenza, A(H3N2)	-4	-70	37	Pharma	No
Bruxvoort 2019c	2017-2018	Test-negative	≥4	Hospital admission with influenza, A(H3N2)	61	-63	91	Pharma	Yes	Includes pediatric ages
Bruxvoort 2019d	2017-2018	Test-negative	≥4	Hospital admission with influenza, any	43	-45	77	Pharma	Yes	Includes pediatric ages
DeMarcus 2019a	2017-2018	Test-negative	≥18	Outpatient consultation, ILI, wih influenza, A	20	-10	50	Non-pharma	Yes	Critical risk of bias
DeMarcus 2019b	2017-2018	Test-negative	≥18	Outpatient consultation, ILI, with A(H1N1)pdm09	-60	-340	40	Non-pharma	Yes	Critical risk of bias
DeMarcus 2019c	2017-2018	Test-negative	≥18	Outpatient consultation, ILI, with influenza	10	-30	40	Non-pharma	Yes	Critical risk of bias
DeMarcus 2019d	2017-2018	Test-negative	≥18	Outpatient consultation, ILI, with influenza, B	-10	-90	30	Non-pharma	Yes	Critical risk of bias
DeMarcus 2019e	2017-2018	Test-negative	≥18	Outpatient consultation, ILI, with influenza, A(H3N2)	30	0	50	Non-pharma	Yes	Critical risk of bias
Divino 2020a	2017-2018	Cohort-retrospective	18-64	Hospital admission & emergency room visits, influenza related	13.1	6.8	19	Pharma	No
Divino 2020b	2017-2018	Cohort-retrospective	50-64	Hospital admission & emergency room visits, influenza related	9.4	0.3	17.6	Pharma	Yes	Subgroup post hoc analysis
Divino 2020b	2017-2018	Cohort-retrospective	≥4	Hospital admission & emergency room visits, influenza related	10.1	1.1	18.2	Pharma	Yes	Includes pediatric ages / broad outcome definition
Divino 2020d	2017-2018	Cohort-retrospective	50-64	Hospital admission & emergency room visits, serious respiratory condition	6.5	NA	NA	Pharma	Yes	Broad outcome definition
Divino 2020e	2017-2018	Cohort-retrospective	18-64	Hospital admission & emergency room visits, serious respiratory condition	8.3	NA	NA	Pharma	Yes	Broad outcome definition
Divino 2020f	2017-2018	Cohort-retrospective	≥4	Hospital admission & emergency room visits, serious respiratory condition	6.9	NA	NA	Pharma	Yes	Includes pediatric ages / broad outcome definition
Divino 2020g	2017-2018	Cohort-retrospective	50-64	Hospital admission, all-cause	5.1	3	7.2	Pharma	Yes	Broad outcome definition
Divino 2020h	2017-2018	Cohort-retrospective	18-64	Hospital admission, all-cause	13	11.7	14.2	Pharma	Yes	Broad outcome definition
Divino 2020i	2017-2018	Cohort-retrospective	≥4	Hospital admission, all-cause	7.4	5.6	9.2	Pharma	Yes	Includes pediatric ages / broad outcome definition
Eick-Cost 2018a	2017-2018	Test-negative	18-64	Medical encounter, with Influenza	5	-10	17	Non-pharma	No
Eick-Cost 2018b	2017-2018	Cohort-retrospective	18-64	Hopital admission, ILI	16	-9	35	Non-pharma	Yes	No information
Eick-Cost 2018c	2017-2018	Cohort-retrospective	18-64	Hospital admission, influenza	46	-18	76	Non-pharma	Yes	No information
Eick-Cost 2018d	2017-2018	Cohort-retrospective	18-64	Medical encounter, ILI	2	1	4	Non-pharma	Yes	No information
Eick-Cost 2018e	2017-2018	Cohort-retrospective	18-64	Medical encounter, Influenza related	16	11	20	Non-pharma	Yes	No information
Izurieta 2019a	2017-2018	Cohort-retrospective	≥65	Outpatient consultation, influenza related	5.7	1.9	9.4	Non-pharma	No
Izurieta 2019b	2017-2018	Cohort-retrospective	≥65	Hospital admission & emergency room visits, influenza related	11	7.9	14	Non-pharma	No
Izurieta 2019c	2017-2018	Cohort-retrospective	≥65	﻿Hospital admission, influenza-related	9.5	5.3	13.4	Non-pharma	No
Klein 2020a	2017-2018	Cohort-retrospective	18-64	﻿Medical encounter, with influenza, A	-5.8	-36.1	17.7	Non-pharma	No
Klein 2020b	2017-2018	Cohort-retrospective	18-64	Medical encounter, with influenza, B	21.4	-7.3	42.4	Non-pharma	No
Martin 2020a	2017-2018	Test-negative	≥18	Hospital admission with influenza, A(H3N2)	24.9	-78.8	68.5	Non-pharma	No
Martin 2020b	2017-2018	Test-negative	≥18	Hospital admission with influenza, B/Yamagata-lineage	1.8	-254	72.8	Non-pharma	No
Martin 2020c	2017-2018	Test-negative	≥18	Hospital admission with influenza, all	8.5	-75.9	52.3	Non-pharma	No
Boikos 2020c	2018-2019	Cohort-retrospective	≥4	Medical encounter, influenza related, high-risk individuals	13.4	11.4	15.4	Pharma	Yes	Includes pediatric ages / high risk individuals
Boikos 2021a	2018-2019	Cohort-retrospective	18-49	Medical encounter, influenza related	7.5	5.7	9.3	Pharma	No	Redundant and unique result*
Boikos 2021b	2018-2019	Cohort-retrospective	50-64	Medical encounter, influenza related	5.6	3.6	7.6	Pharma	No	Redundant and unique result*
Boikos 2021c	2018-2019	Cohort-retrospective	≥65	Medical encounter, influenza related	-2.2	-5.4	0.9	Pharma	No
Boikos 2021d	2018-2019	Cohort-retrospective	18-64	Medical encounter, influenza related	6.5	5.2	7.9	Pharma	No
Fu Tseng 2019a	2018-2019	Test-negative	≥65	Hospital admission with influenza A	-6	-54.26	28	Non-pharma	No
Fu Tseng 2019b	2018-2019	Test-negative	≥65	Hospital admission with linfluenza	-4	-50.28	26	Non-pharma	No
Fu Tseng 2019c	2018-2019	Test-negative	≥65	Hospital admission with A(H1N1) pdm09	-32	-117	20	Non-pharma	No
Fu Tseng 2019d	2018-2019	Test-negative	≥65	Hospital admission with A(H3N2)	6	-75	49	Non-pharma	No
Fu Tseng 2019e	2018-2019	Test-negative	≥65	Hospital admission with A untyped	36	-86	78	Non-pharma	No
Fu Tseng 2019f	2018-2019	Test-negative	≥4	Hospital admission with A untyped	9	-337	81	Non-pharma	Yes	Includes pediatric ages
Fu Tseng 2019g	2018-2019	Test-negative	≥4	Hospital admission with A(H1N1) pdm09	-8	-123	48	Non-pharma	Yes	Includes pediatric ages
Fu Tseng 2019h	2018-2019	Test-negative	≥4	Hospital admission with A(H3N2)	-45	-235	38	Non-pharma	Yes	Includes pediatric ages
Fu Tseng 2019i	2018-2019	Test-negative	≥4	Hospital admission with influenza	-15	-95	32	Non-pharma	Yes	Includes pediatric ages
Fu Tseng 2019j	2018-2019	Test-negative	≥4	Hospital admission with influenza	-17	-97	31	Non-pharma	Yes	Includes pediatric ages
Izurieta 2020a	2018-2019	Cohort-retrospective	≥65	Hospital admission & emergency room visits, influenza related	2.5	-2.4	7.3	Non-pharma	No
Izurieta 2020b	2018-2019	Cohort-retrospective	≥65	﻿Hospital admission, influenza-related	4.4	-1.9	10.3	Non-pharma	No
Krishnarajah 2021	2018-2019	Cohort-retrospective	18-64	Hospital admission & emergency room visits, influenza related	4.9	-2.8	12.1	Pharma	No
Izurieta 2020c	2019-2020	Cohort-retrospective	≥65	Hospital admission & emergency room visits, influenza related	2.5	-2.8	7.6	Non-pharma	No
Izurieta 2020d	2019-2020	Cohort-retrospective	≥65	﻿Hospital admission, influenza-related	1.3	-5.7	7.9	Non-pharma	No
arVE, adjusted relative vaccine effectiveness. CI, confidence interval. NA, not available.
* Boikos 2021a, Boikos 2021b, Boikos 2021d reported results in preventing medical encounters in the 18-49, 50-64 and 18 to 64 age-groups. We opted to keep the results of the 18-64 age-group. No other study reported results for the 18-49, 50-64 age groups.
